# Supplementary material
Source: PubMed Central journal article supplement (PMC1459022)

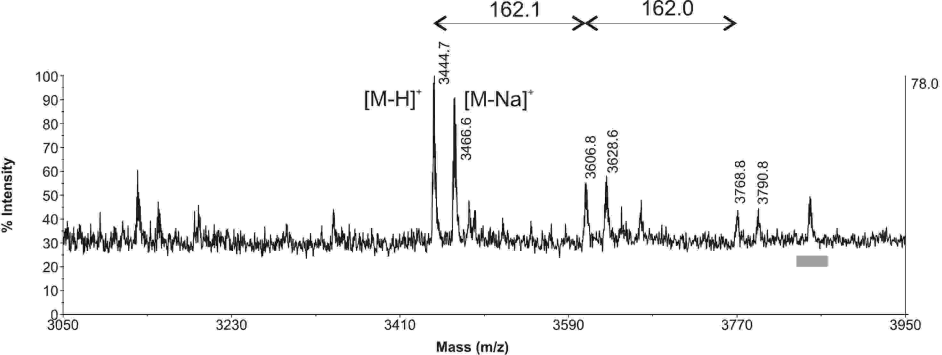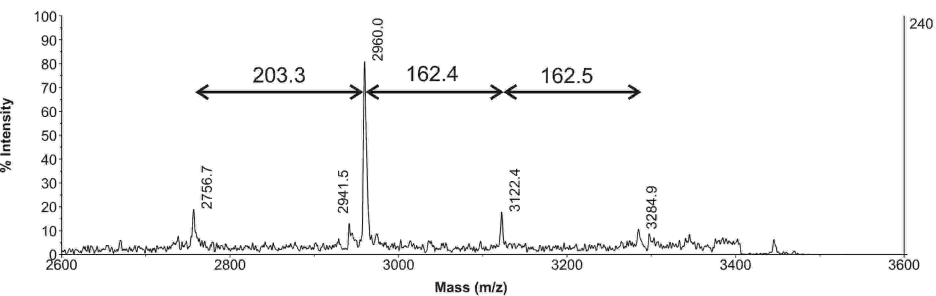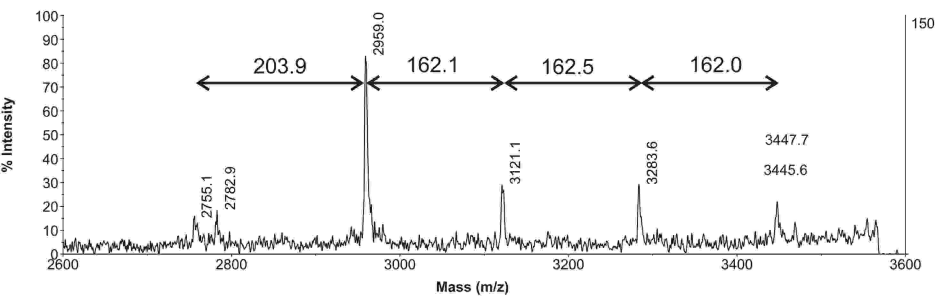

Supplement: pnas_0509207103_1.pdf [file pnas_0509207103_1.pdf]
